# Supplementary material for: Increased MYBL2 expression in aggressive hormone‐sensitive prostate cancer
Source: PubMed Central journal article supplement (PMC9718114; doi:10.1002/1878-0261.13314), 2022-10-02
Supplement: MOL2-16-3994-s001.pdf [file MOL2-16-3994-s001.pdf]

**A**

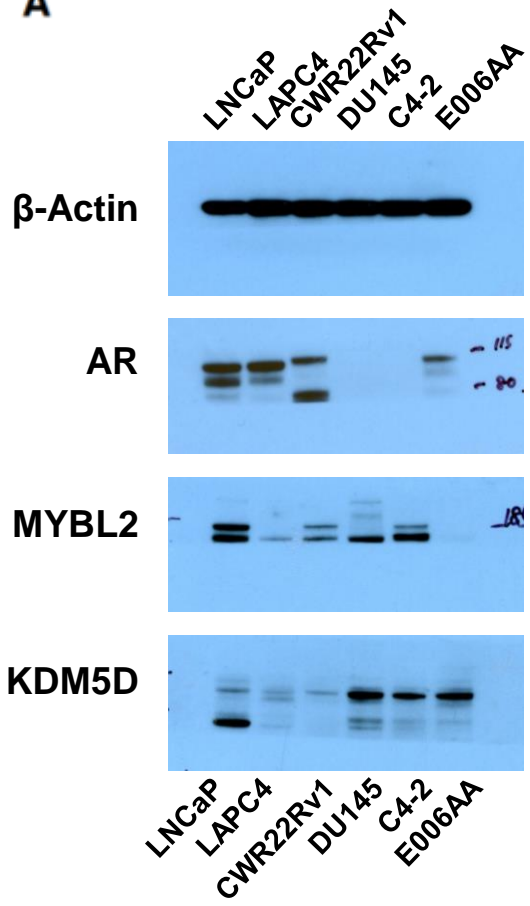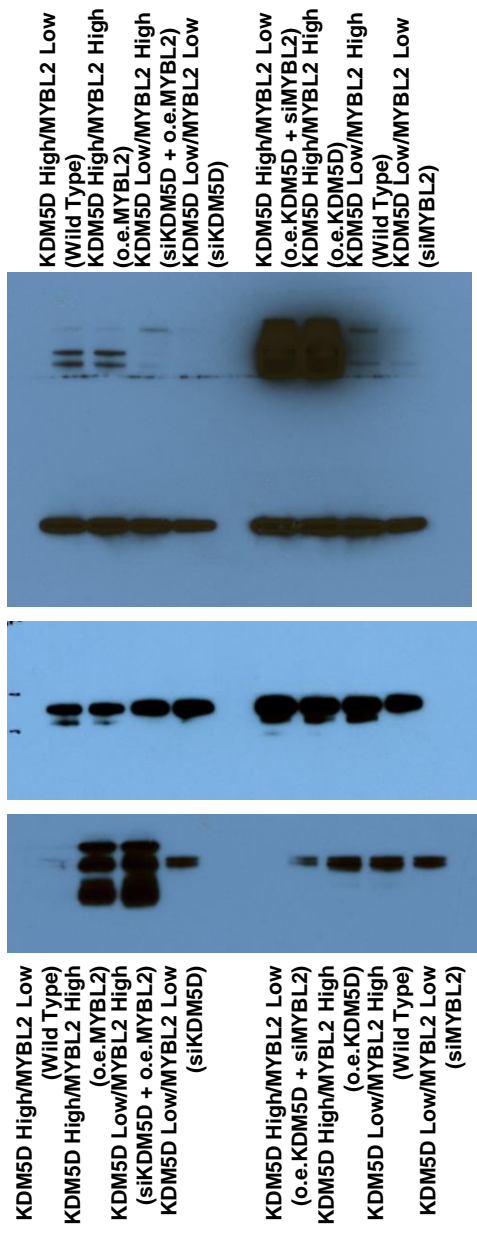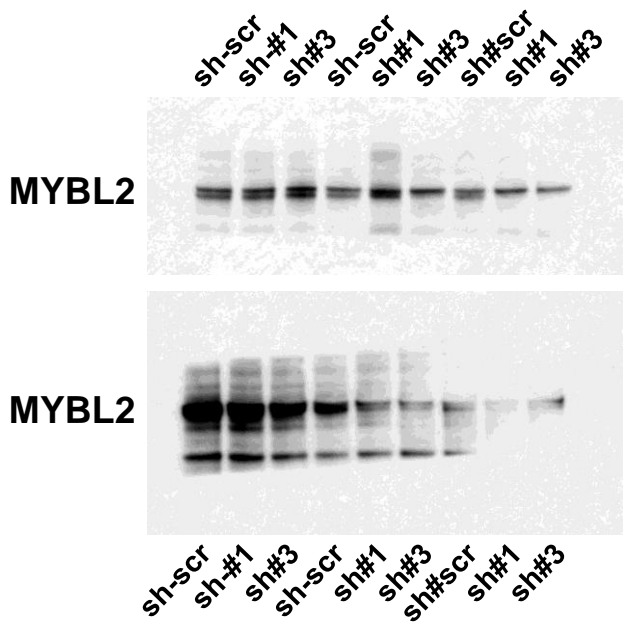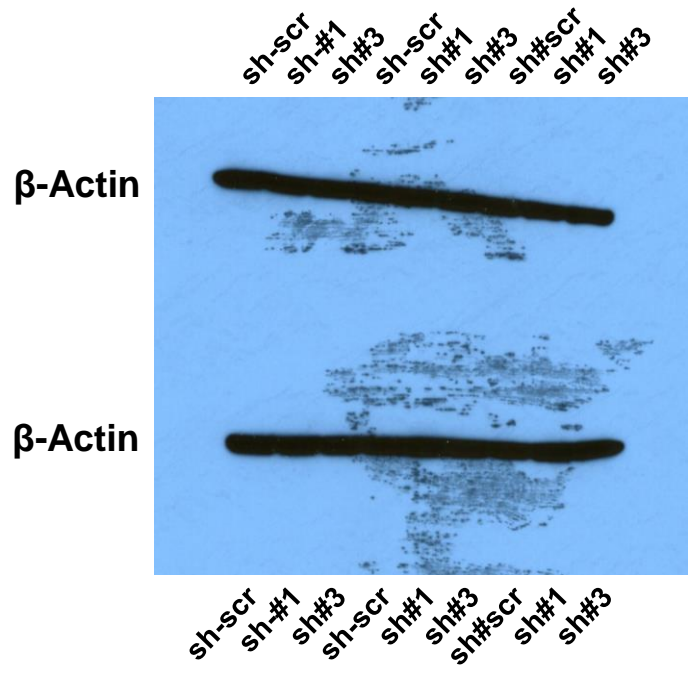

Supplementary Figure 1

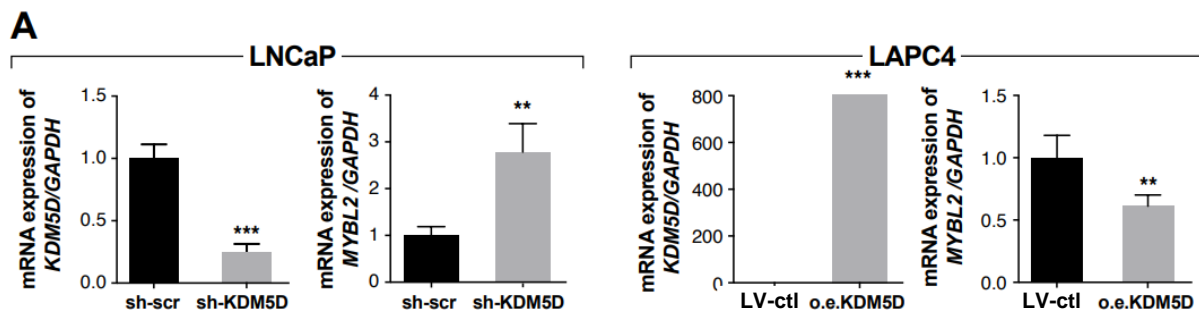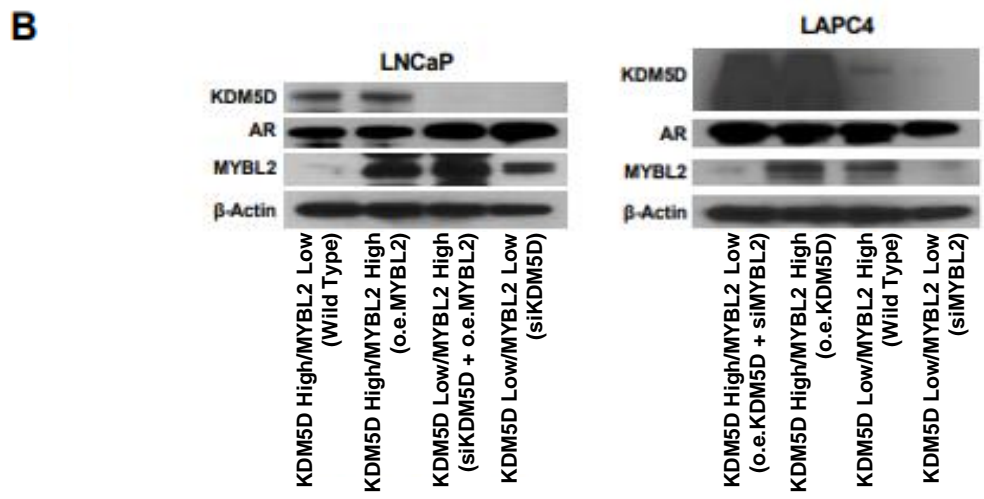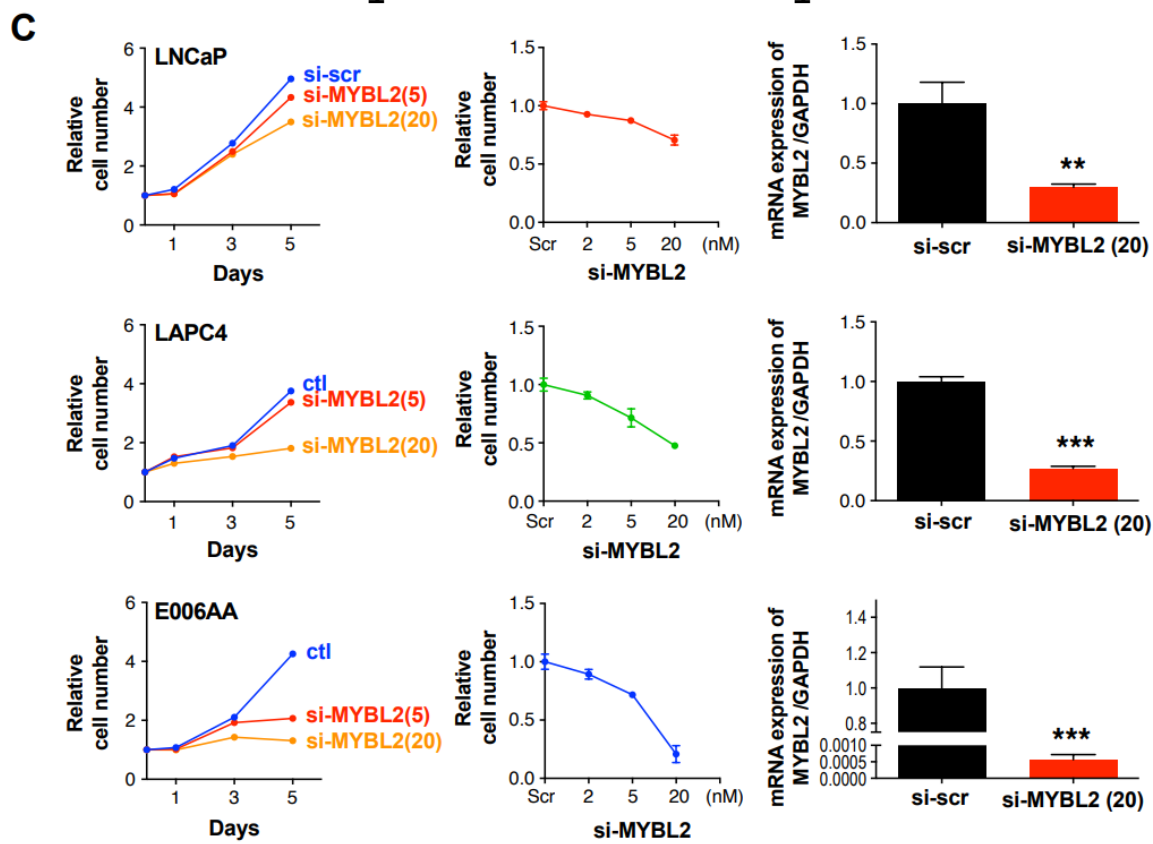

Supplementary Figure 2

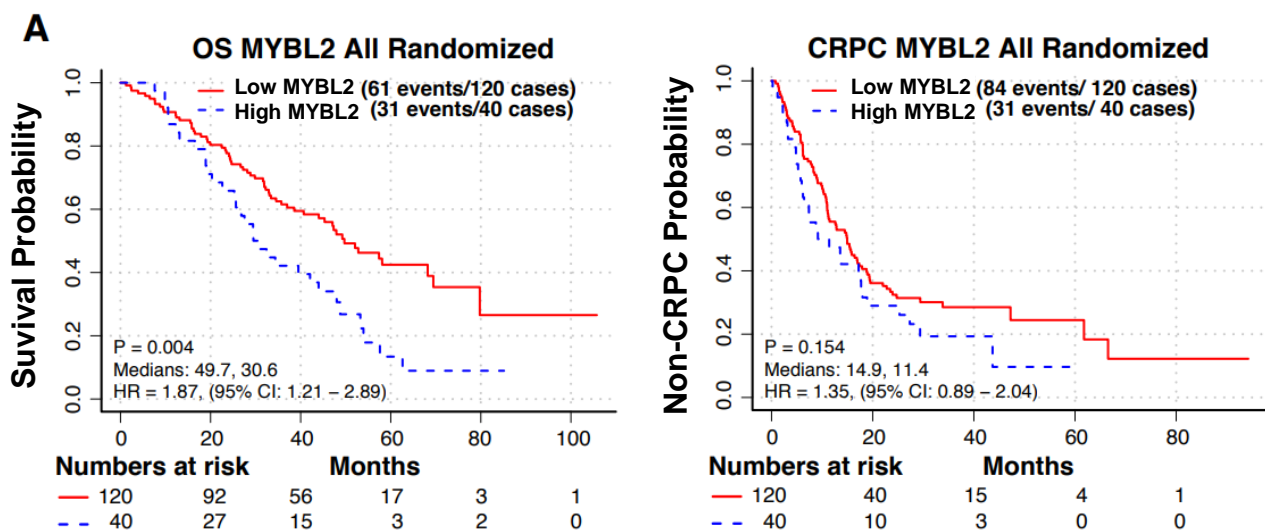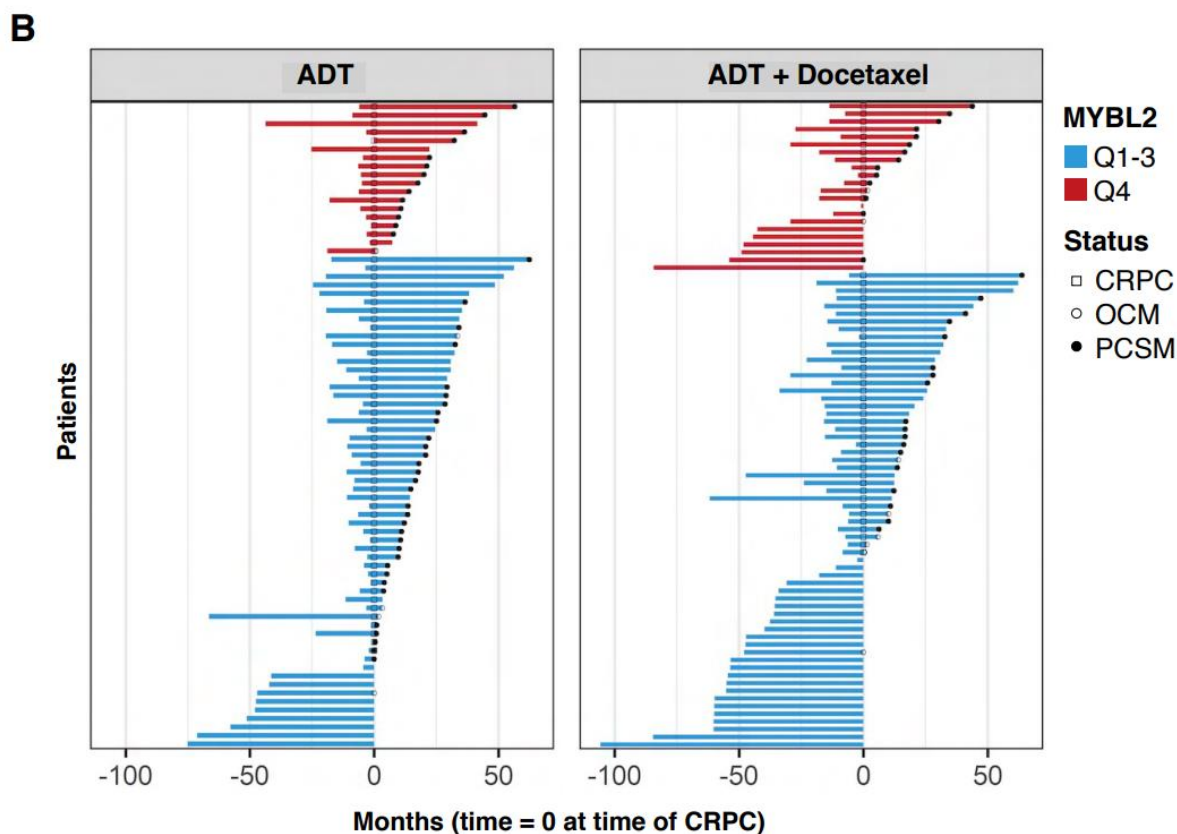

**A****OS KDM5D ADT**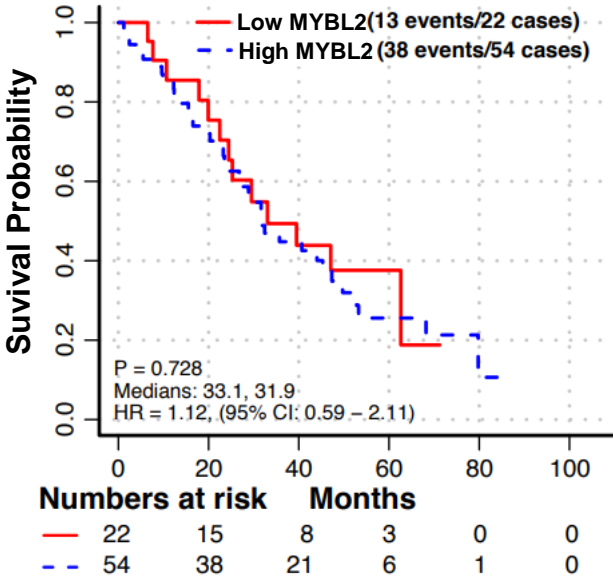**CRPC KDM5D ADT**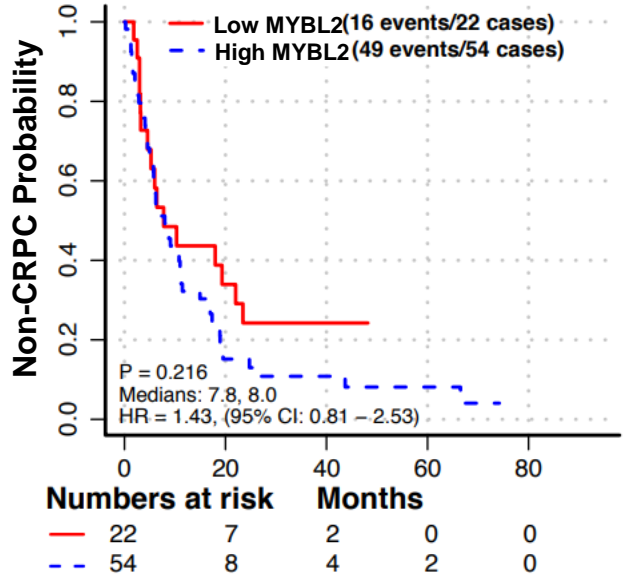**B****OS KDM5D ADT + Docetaxel**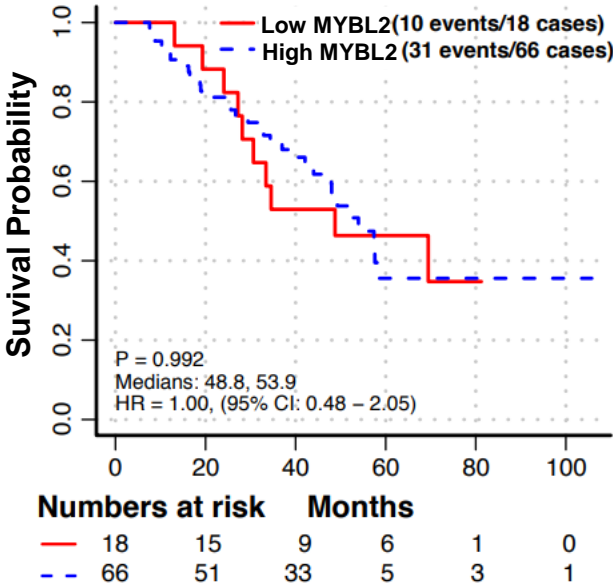**CRPC KDM5D ADT + Docetaxel**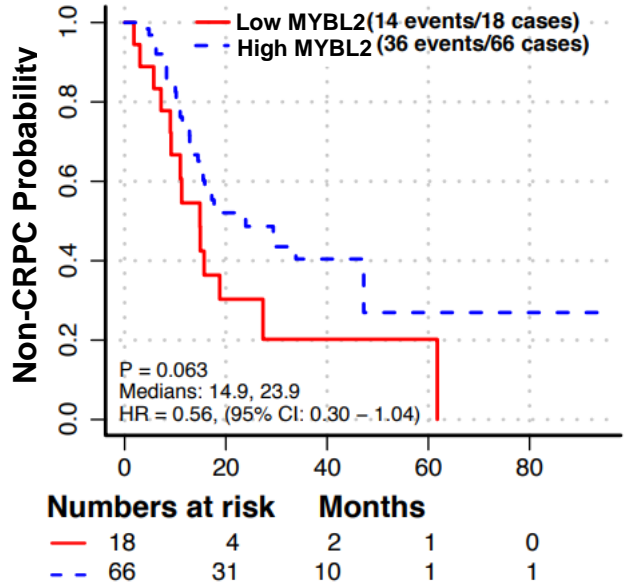

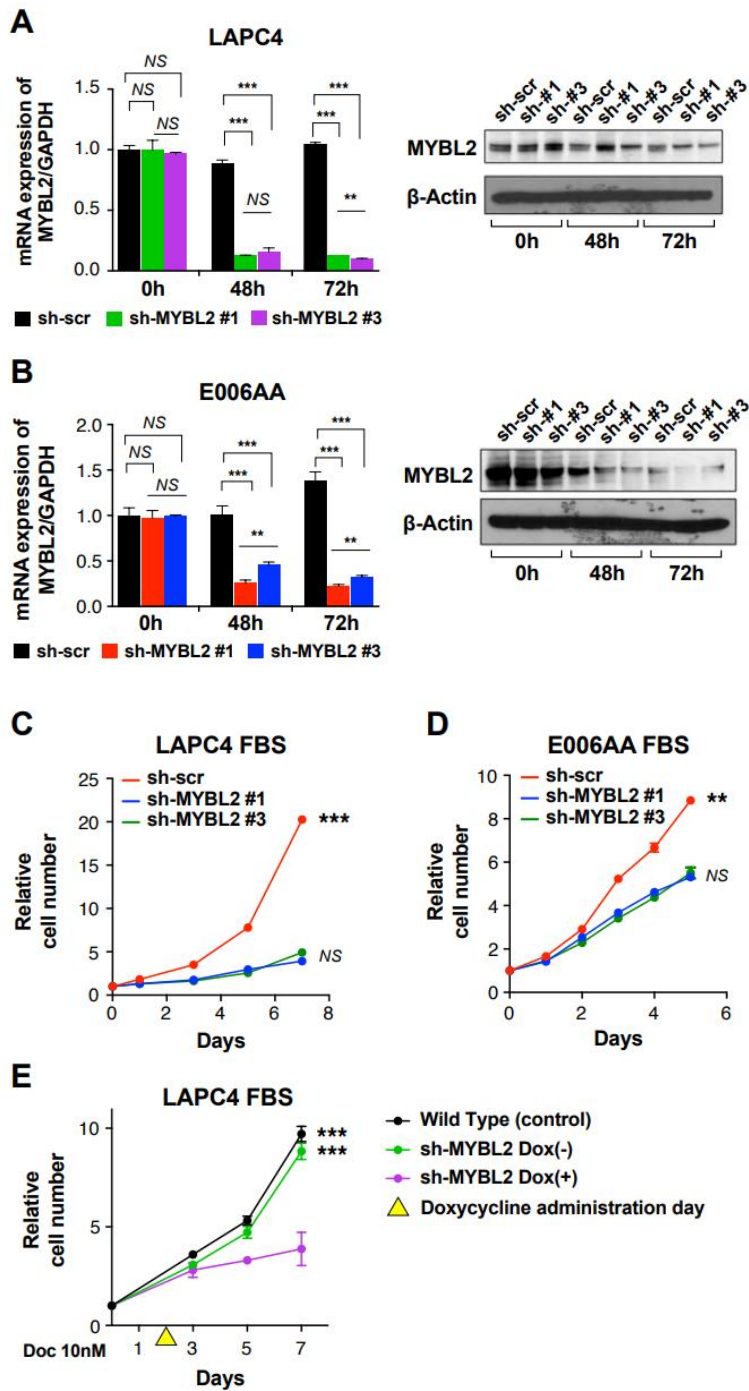

**A****LNCaP Docetaxel 3 Days**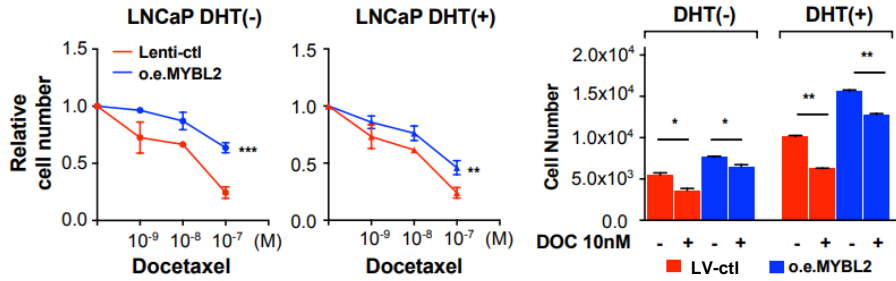**B****LAPC4 Docetaxel 3 Days**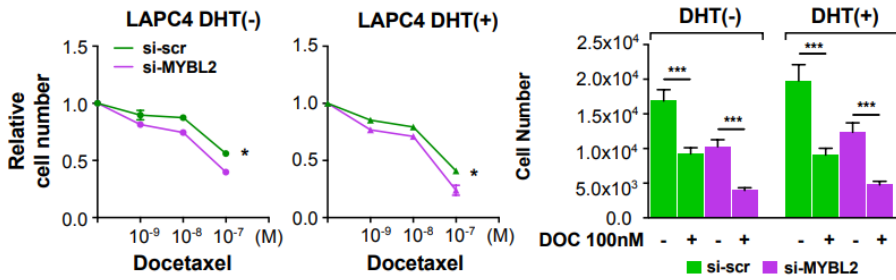**C****LNCaP VE-822**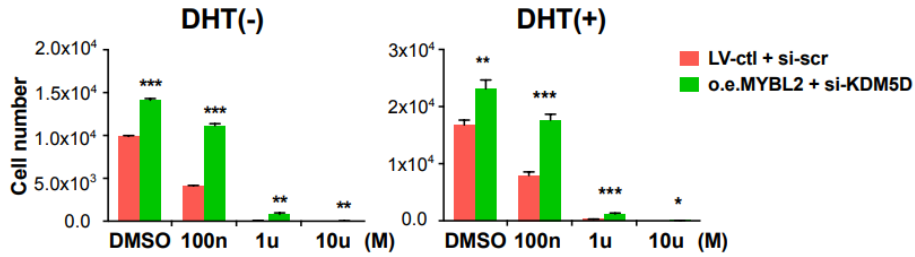**D****LAPC4 VE-822**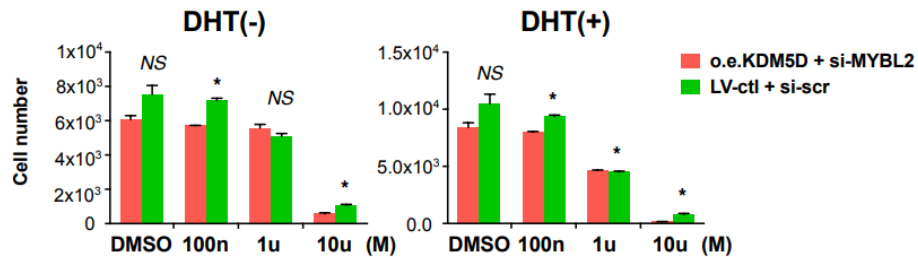

## Supporting Information section

### Supplementary Figure Legends

#### Supplementary Figure 1: Western blot sheet

(A) Western blot sheet

Upper left; The protein expression levels of KDM5D,  $\beta$ -Actin, AR, and MYBL2 in LNCaP, LAPC4, CWR22Rv1, DU145, C4-2, and E006AA cell lines.

Upper right; The protein expression levels of KDM5D,  $\beta$ -Actin, AR, and MYBL2 in LNCaP and LAPC4 (each cells shows High/ Low KDM5D and High/ Low MYBL2) cell lines.

Under left; The protein expression levels of MYBL2 in sh-MYBL2 in LNCaP and E006AA.

Under right; The protein expression levels of  $\beta$ -Actin in sh-MYBL2 in LNCaP and E006AA.

#### Supplementary Figure 2: Cell lines phenotype silencing MYBL2

(A) mRNA expression level of KDM5D and MYBL2 in LNCaP (sh-control and sh-KDM5D) and LAPC4 (sh-control and over expression KDM5D) with FBS media. Error bars indicate standard deviation. (t-test; \*\* indicates  $p < 0.01$ ; \*\*\*,  $p < 0.001$ ).

(B) Western blot analysis of KDM5D, AR and MYBL2 levels corresponding to the RNA manipulations for Fig 2B after overexpressing or silencing KDM5D and/or MYBL2 as indicated

(C) Cell proliferation silencing MYBL2 (si-control, si-MYBL2 (5nM, 20nM)) with FBS media in three kind of cell lines. Cell proliferation after 3 days induced si-MYBL2 dose dependent (si-control(20nM), si-MYBL2 (2nM, 5nM, 20nM)) in three kind of cell lines. mRNA expression levels of MYBL2 by silencing MYBL2. Error bars indicate standard deviation. (t-test; \*\* indicates  $p < 0.01$ ; \*\*\*,  $p < 0.001$ ).

#### Supplementary Figure 3: Clinical outcomes in CHAARTED

(A) Clinical outcomes time to CRPC and OS related with MYBL2 expression level in all treatment from CHAARTED. (High = upper quartile)

(B) Time to CRPC and time from CRPC to death by treatment arm and MYBL2 status.

*Abbreviations: CRPC, castration resistant prostate cancer; OCM, other cause mortality; PCSM, prostate cancer specific mortality; Q1, lowest quartile; Q2-3, middle quartiles; Q4, highest quartile.*

#### Supplementary Figure 4: Impact of KDM5D and MYBL2 on time to CRPC and OS in CHAARTED

(A) Clinical outcomes time to CRPC from CHAARTED by KDM5D levels (Low = lower quartile).

(B) Clinical outcomes time to OS from CHAARTED by KDM5D levels (Low = lower quartile).

#### Supplementary Figure 5: Doxycycline induced sh-MYBL2

Error bars indicate standard deviation. (t-test; \*\* indicates  $p < 0.01$ ; \*\*\*,  $p < 0.001$ ).

(A) The time course of mRNA expression levels of MYBL2 in LAPC4 sh-control, sh-MYBL2#1, and sh-MYBL2#3 after administrated doxycycline 0 hour, 48 hours, and 72 hours.

(B) The time course of mRNA expression levels of MYBL2 in E006AA sh-control, sh-MYBL2#1, and sh-MYBL2#3 after administrated doxycycline 0 hour, 48 hours, and 72 hours.

(C) Cell proliferation assay of indicated cell lines in FBS media. LAPC4 sh-control vs sh-MYBL2#1 and #3.

(D) Cell proliferation assay of indicated cell lines in FBS media. E006AA sh-control vs sh-MYBL2#1 and #3.

(E) Cell proliferation assay of indicated cell lines with doxycycline inducible MYBL2 in FBS media. LAPC4 sh-control vs sh-MYBL2#1 and #3 with doxycycline treatment.

**Supplementary Figure 6: Impact of KDM5D and MYBL2 on Sensitivity to drugs in HSPC**

Error bars indicate standard deviation. (t-test; \* indicates  $p < 0.05$ ; \*\*,  $p < 0.01$ ; \*\*\*,  $p < 0.001$ ).

(A) Docetaxel sensitivity Lenti-control ( $=KDM5D^{Hi} / MYBL2^{Lo}$ ) vs overexpression MYBL2 ( $=KDM5D^{Hi} / MYBL2^{Hi}$ ) in LNCaP with CSS plus DHT without DHT.

(B) Docetaxel sensitivity si-control ( $=KDM5D^{Lo} / MYBL2^{Hi}$ ) vs si-MYBL2 ( $=KDM5D^{Lo} / MYBL2^{Lo}$ ) in LAPC4 with CSS plus DHT without DHT.

(C) Drug sensitivity of VE-822 (ATR-inhibitor) Lenti-control plus si-control ( $=KDM5D^{Hi} / MYBL2^{Lo}$ ) vs overexpression MYBL2 plus si-KDM5D ( $=KDM5D^{Lo} / MYBL2^{Hi}$ ) in LNCaP with CSS plus DHT without DHT.

(D) Drug sensitivity of VE-822 (ATR-inhibitor) Lenti-control plus si-control ( $=KDM5D^{Lo} / MYBL2^{Hi}$ ) vs overexpression KDM5D plus si-MYBL2 ( $=KDM5D^{Hi} / MYBL2^{Lo}$ ) in LAPC4 with CSS plus DHT without DHT.



### Supplementary Table 1: Materials

| <b>Protein</b>        | <b>Antibody</b> | <b>Vendor</b>             | <b>Catalog Number</b> |
|-----------------------|-----------------|---------------------------|-----------------------|
| Androgen Receptor     | Rabbit          | Cell Signaling Technology | #5153                 |
| KDM5D / Jarid1D       | Rabbit          | Abcam                     | ab227728              |
| B-Myb                 | Rabbit          | Novus Biologicals         | NBP2-33930            |
| $\beta$ -Actin        | Mouse           | Santa Cruz Biotechnology  | sc-47778              |
| PARP                  | Rabbit          | Cell Signaling Technology | #9542                 |
| CyclinA               | Mouse           | Santa Cruz Biotechnology  | sc-271682             |
| p27 Kip1              | Rabbit          | Cell Signaling Technology | #2552                 |
| <b>RNA(Primer)</b>    | <b>Target</b>   |                           | <b>Catalog Number</b> |
| MYBL2                 | Human           | Hs00942540_m1             | 4331182               |
| MYBL2                 | Human           | Hs00942547_m1             | 4351372               |
| MYBL2                 | Human           | Hs00942552_m1             | 4351372               |
| MYBL2                 | Human           | Hs00942541_m1             | 4351372               |
| MYBL2                 | Human           | Hs00942551_m1             | 4351372               |
| MYBL2                 | Human           | Hs00942549_m1             | 4351372               |
| KDM5D                 | Human           | Hs00190491_m1             | 4331182               |
| KDM5D                 | Human           | Hs05049162_s1             | 4351372               |
| KDM5D                 | Human           | Hs01104401_g1             | 4351372               |
| KDM5D                 | Human           | Hs01104405_gH             | 4351372               |
| KDM5D                 | Human           | Hs01104389_g1             | 4351372               |
| KDM5D                 | Human           | Hs01104397_gH             | 4331182               |
| GAPDH                 | Human           | Hs99999905_m1             | 4331182               |
| <b>siRNA</b>          | <b>Target</b>   | <b>Vendor</b>             | <b>Catalog Number</b> |
| si-MYBL2              | Human           | Dharmacon                 | L-010444-00-0005      |
| si-KDM5D              | Human           | Dharmacon                 | L-010820-00-0005      |
| <b>Overexpression</b> |                 |                           |                       |
| B-MYB                 |                 | Origene                   | RC203540L3V           |
| KDM5D                 |                 | Dharmacon                 | MHS6278-213246113     |

## shRNAs

sh-scramble (control)

Forward:

CCGGTTTCTCCGAACGTGTCACGTCTCGAGACGTGACACGTTCCGAGAATTTTTG

Reverse:

AATTCAAAAATTCTCCGAACGTGTCACGTCTCGAGACGTGACACGTTCCGAGAAA

sh-KDM5D

Forward:

CCGGTGTAACACACACCCGTTTGACACTCGAGTGTCAAACGGGTGTGTGTTACTTTTTG

Reverse:

AATTCAAAAAGTAACACACACCCGTTTGACACTCGAGTGTCAAACGGGTGTGTGTTACA

sh-MYBL2 #1

Forward:

CCGGTGCTTCTTGAGCGAGTCCAAAGCTCGAGCTTTGGACTCGCTCAAGAAGCTTTTTG

Reverse:

AATTCAAAAAGCTTCTTGAGCGAGTCCAAAGCTCGAGCTTTGGACTCGCTCAAGAAGCA

sh-MYBL2 #3

Forward:

CCGGTGACACAGGAGGCTTCTTGAGCCTCGAGGCTCAAGAAGCCTCCTGTGTCTTTTTG

Reverse:

AATTCAAAAAGACACAGGAGGCTTCTTGAGCCTCGAGGCTCAAGAAGCCTCCTGTGTCA

| <b>Drug</b> | <b>Vendor</b> | <b>Catalog Number</b> |
|-------------|---------------|-----------------------|
| Docetaxel   | Selleckchem   | S1148                 |
| Cabazitaxel | Selleckchem   | S3022                 |
| VE-822      | Selleckchem   | S7102                 |
| Ribociclib  | Selleckchem   | S7440                 |
| Abiraterone | Selleckchem   | S1123                 |



**Supplementary Table 2: quantitative analysis of cell cycle profiles**

| <b>LNCaP Wild Type</b> |               |         |            |
|------------------------|---------------|---------|------------|
|                        | G0 / G1 phase | S phase | G2/M phase |
| %Gated                 | 66.7          | 9.0     | 22.9       |
| Mean                   | 1501.3        | 2103.6  | 2827.9     |

  

| <b>LNCaP LV-control + si-scramble</b> |               |         |            |
|---------------------------------------|---------------|---------|------------|
|                                       | G0 / G1 phase | S phase | G2/M phase |
| %Gated                                | 64.9          | 13.4    | 18.2       |
| Mean                                  | 1406.4        | 2102.6  | 2773.2     |

  

| <b>LNCaP o.e.MYBL2 + si-KDM5D</b> |               |         |            |
|-----------------------------------|---------------|---------|------------|
|                                   | G0 / G1 phase | S phase | G2/M phase |
| %Gated                            | 64.5          | 12.2    | 20.1       |
| Mean                              | 1385.4        | 2150.3  | 2734.8     |

  

| <b>LAPC4 Wild Type</b> |               |         |            |
|------------------------|---------------|---------|------------|
|                        | G0 / G1 phase | S phase | G2/M phase |
| %Gated                 | 58.5          | 14.7    | 25.5       |
| Mean                   | 1226.3        | 1757.5  | 2311.5     |

  

| <b>LAPC4 LV-control + si-scramble</b> |               |         |            |
|---------------------------------------|---------------|---------|------------|
|                                       | G0 / G1 phase | S phase | G2/M phase |
| %Gated                                | 59.4          | 14.6    | 24.9       |
| Mean                                  | 1252.3        | 1753.4  | 2303.1     |

  

| <b>LAPC4 o.e.KDM5D + si-MYBL2</b> |               |         |            |
|-----------------------------------|---------------|---------|------------|
|                                   | G0 / G1 phase | S phase | G2/M phase |
| %Gated                            | 40.5          | 12.7    | 45.7       |
| Mean                              | 1150.1        | 1769.5  | 2242.7     |
